# Supplementary material for: Impact of repeat revascularization within 5 years on 10-year mortality after percutaneous or surgical revascularization
Source: Springer Nature journal article supplement (doi:10.1007/s00392-023-02211-6), 2023-05-08
Supplement: MOESM1 [file 25331528]

## Supplemental material

1. **Table S1.** Baseline and procedural characteristics according to the need of repeat revascularizations in the overall population.
2. **Table S2.** Baseline and procedural characteristics according to the need of repeat revascularizations after initial PCI and CABG.

**Table S1. Baseline and procedural characteristics according to the need of repeat revascularizations in the overall population.**

|                                     | Overall population (n=1800) |                |       |
|-------------------------------------|-----------------------------|----------------|-------|
|                                     | RR (n=330)                  | No RR (n=1470) | p     |
| <b>Age, yrs</b>                     | 64.3 ± 9.1                  | 65.3 ± 9.8     | 0.112 |
| <b>Female</b>                       | 22.4 (74)                   | 22.3 (328)     | 0.965 |
| <b>Hypertension</b>                 | 72.1 (238)                  | 65.2 (958)     | 0.016 |
| <b>Dyslipidemia</b>                 | 81.0 (265)                  | 77.2 (1126)    | 0.133 |
| <b>Medically treated DM</b>         | 31.2 (103)                  | 23.7 (349)     | 0.005 |
| <b>Current smoker</b>               | 17.6 (58)                   | 20.8 (305)     | 0.182 |
| <b>Previous MI</b>                  | 30.0 (99)                   | 33.1 (486)     | 0.283 |
| <b>Peripheral vascular disease</b>  | 10.6 (35)                   | 9.7 (142)      | 0.602 |
| <b>Previous stroke</b>              | 3.3 (11)                    | 4.6 (67)       | 0.312 |
| <b>COPD</b>                         | 8.8 (29)                    | 8.5 (125)      | 0.867 |
| <b>Chronic Kidney Disease</b>       | 14.5 (48)                   | 18.2 (268)     | 0.011 |
| <b>Congestive heart failure</b>     | 5.5 (18)                    | 4.5 (65)       | 0.444 |
| <b>BMI, kg/m2</b>                   | 28.2 ± 4.8                  | 28.0 ± 4.7     | 0.441 |
| <b>Logistic EuroSCORE</b>           | 3.6 ± 2.4                   | 3.8 ± 2.7      | 0.128 |
| <b>3VD</b>                          | 57.9 (191)                  | 61.5 (904)     | 0.224 |
| <b>Left main</b>                    | 42.1 (139)                  | 38.5 (566)     | 0.224 |
| <b>SYNTAX Score</b>                 | 28.9 ± 11.7                 | 28.7 ± 11.4    | 0.826 |
| <b>Incomplete revascularization</b> | 49.7 (164)                  | 39.3 (578)     | 0.001 |

BMI: body mass index; CABG: coronary artery bypass graft; COPD: chronic obstructive pulmonary disease; DM: diabetes mellitus; MI: myocardial infarction; PCI: percutaneous coronary intervention; RR: repeat revascularization; 3VD: 3-vessel disease.

**Table S2. Baseline and procedural characteristics according to the need of repeat revascularizations after initial PCI and CABG.**

|                                     | PCI (n=903) |               |       | CABG (n=897) |               |       |
|-------------------------------------|-------------|---------------|-------|--------------|---------------|-------|
|                                     | RR (n=220)  | No RR (n=683) | p     | RR (n=110)   | No RR (n=787) | p     |
| <b>Age, yrs</b>                     | 64.8 ± 9.2  | 65.4±9.8      | 0.452 | 63.4 ± 9.0   | 65.2 ± 9.9    | 0.069 |
| <b>Female</b>                       | 24.5 (54)   | 23.3 (159)    | 0.701 | 18.2 (20)    | 21.5 (169)    | 0.428 |
| <b>Hypertension</b>                 | 73.6 (162)  | 67.3 (460)    | 0.080 | 69.1 (76)    | 63.3 (498)    | 0.234 |
| <b>Dyslipidemia</b>                 | 81.6 (177)  | 77.8 (528)    | 0.233 | 80.0 (88)    | 76.8 (598)    | 0.449 |
| <b>Medically treated DM</b>         | 34.1 (75)   | 22.8 (156)    | 0.001 | 25.5 (28)    | 24.5 (193)    | 0.832 |
| <b>Current smoker</b>               | 15.9 (35)   | 19.3 (132)    | 0.256 | 20.9 (23)    | 22.2 (173)    | 0.763 |
| <b>Previous MI</b>                  | 32.7 (72)   | 31.2 (213)    | 0.669 | 24.5 (27)    | 34.7 (273)    | 0.035 |
| <b>Peripheral vascular disease</b>  | 9.5 (21)    | 8.9 (61)      | 0.783 | 12.7 (14)    | 10.3 (81)     | 0.437 |
| <b>Previous stroke</b>              | 3.6 (8)     | 4.0 (27)      | 0.821 | 2.7 (3)      | 5.1 (40)      | 0.272 |
| <b>COPD</b>                         | 9.1 (20)    | 7.5 (51)      | 0.436 | 8.2 (9)      | 9.4 (74)      | 0.679 |
| <b>Chronic Kidney Disease</b>       | 15.5 (34)   | 19.5 (133)    | 0.105 | 12.7 (14)    | 17.2 (135)    | 0.301 |
| <b>Congestive heart failure</b>     | 4.6 (10)    | 3.8 (26)      | 0.629 | 7.3 (8)      | 5.1 (39)      | 0.335 |
| <b>BMI, kg/m2</b>                   | 28.4 ± 4.8  | 28.0 ± 4.8    | 0.393 | 27.9 ±4.8    | 27.9 ± 4.5    | 0.921 |
| <b>Logistic EuroSCORE</b>           | 3.7 ± 2.4   | 3.8 ± 2.7     | 0.815 | 3.3 ± 2.3    | 3.9 ± 2.7     | 0.032 |
| <b>3VD</b>                          | 59.1 (130)  | 60.9 (416)    | 0.632 | 55.5 (61)    | 62.0 (488)    | 0.186 |
| <b>Left main</b>                    | 40.9 (90)   | 39.1 (267)    | 0.632 | 44.5 (49)    | 38.0 (299)    | 0.186 |
| <b>SYNTAX Score</b>                 | 29.6 ± 11.4 | 28.0 ± 11.5   | 0.081 | 27.5 ± 12.1  | 29.3 ± 11.3   | 0.108 |
| <b>Incomplete revascularization</b> | 53.6 (118)  | 40.6 (277)    | 0.001 | 41.8 (46)    | 38.2 (301)    | 0.471 |

BMI: body mass index; CABG: coronary artery bypass graft; COPD: chronic obstructive pulmonary disease; DM: diabetes mellitus; MI: myocardial infarction; PCI: percutaneous coronary intervention;  
RR: repeat revascularization; 3VD: 3-vessel disease
